# Supplementary material
Source: PubMed Central journal article supplement (PMC3463266)
Supplement: cr201288x2.pdf [file cr201288x2.pdf]

Supplementary information, Figure S2

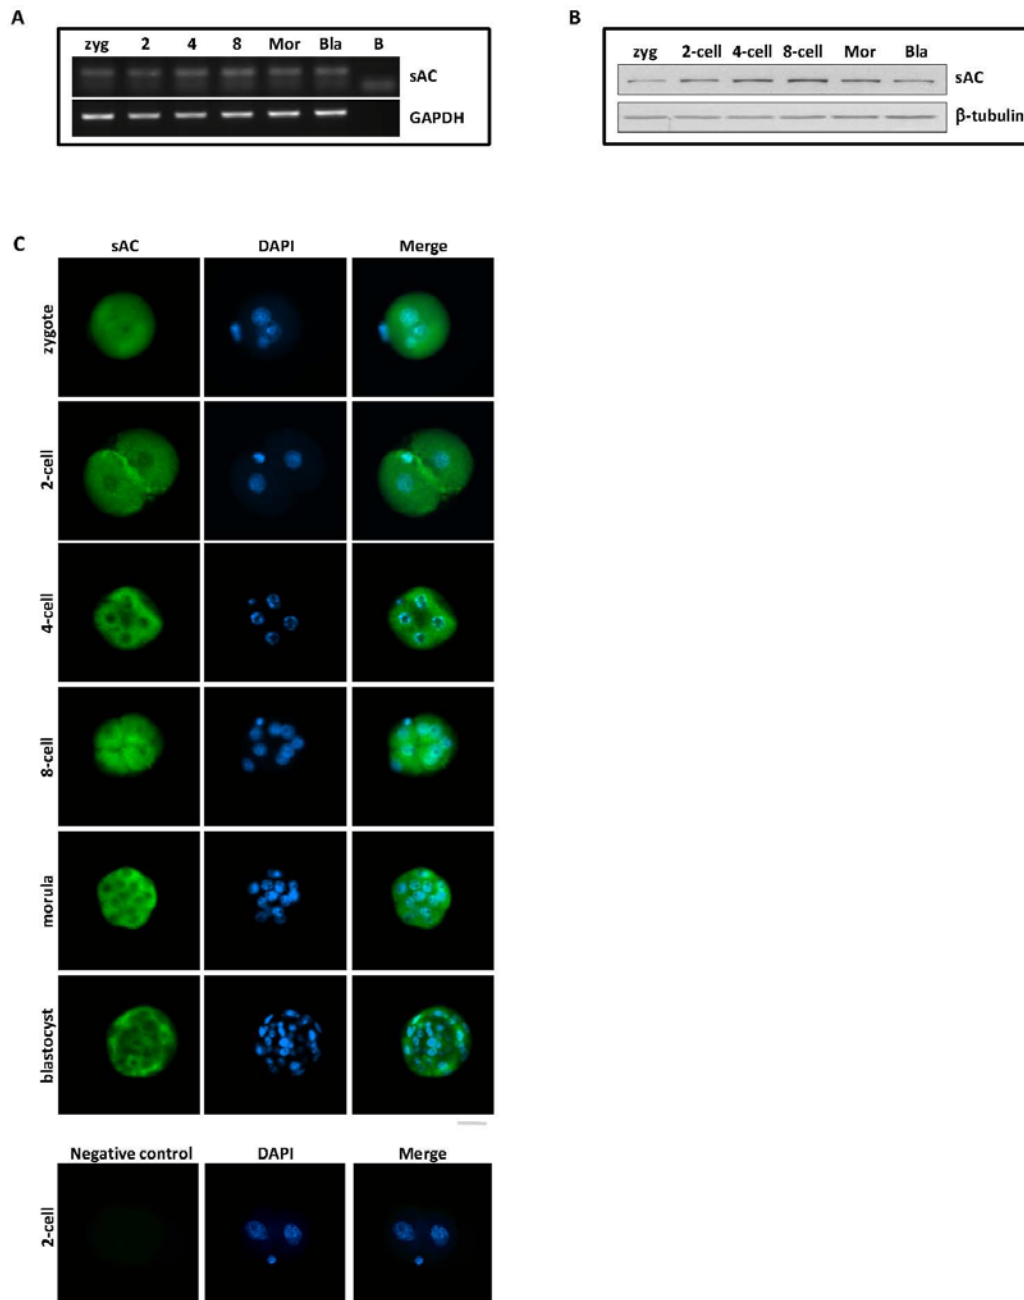

**Figure S2** Expression of sAC in mouse embryo. **(A)** RT-PCR analysis of mRNA expression of sAC from zygote to blastocyst, with GAPDH as internal control. Zy: zygote, 2, 4, 8: two, four, eight-cell embryos, Mor: morula, Bla: blastocyst, B: blank. **(B)** Western blot analysis of sAC expression from zygote to blastocyst with the expected band size of sAC at 180kDa.  $\beta$ -tubulin was used as protein loading control. **(C)** Immunofluorescent staining shows the localization of sAC (green) in the cytoplasm of embryos, with nuclei counterstained by DAPI (blue). 2-cell embryos were used in negative control group. Scale bar: 50  $\mu$ m.
