# Supplementary material
Source: PubMed Central journal article supplement (PMC3463266)
Supplement: cr201288x3.pdf [file cr201288x3.pdf]

### Supplementary information, Figure S3

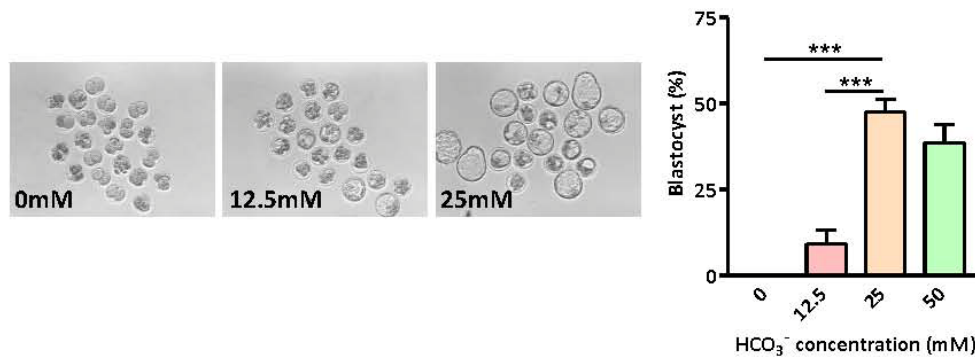

**Figure S3** Effects of HCO<sub>3</sub><sup>-</sup> on blastocyst formation. Embryos were cultured in different concentration of HCO<sub>3</sub><sup>-</sup>. Formation of blastocyst was significantly inhibited by removing or reducing extracellular HCO<sub>3</sub><sup>-</sup> (0 mM: 0/108 embryos; 12.5 mM: 10/106 embryos; 25 mM: 51/110 embryos; 50 mM: 40/105 embryos). Data are represented as mean ± SEM, One way ANOVA, \*\*\**P* < 0.001.
