# Supplementary material
Source: PubMed Central journal article supplement (PMC3463266)
Supplement: cr201288x4.pdf [file cr201288x4.pdf]

## Supplementary information, Figure S4

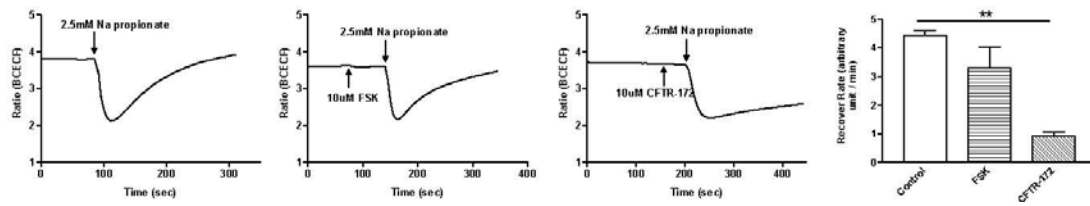

**Figure S4** CFTR mediates  $\text{HCO}_3^-$  influx in mouse embryo. Inhibiting CFTR by specific inhibitor CFTRinh172 (10  $\mu\text{M}$ ) significantly inhibit the intracellular pH recovery from sodium propionate induced cellular acidification. Addition of forskolin (10  $\mu\text{M}$ ) has no effects on the pH recovery rate.
