# Supplementary material
Source: PubMed Central journal article supplement (PMC3463266)
Supplement: cr201288x5.pdf [file cr201288x5.pdf]

Supplementary information, Table S1

| Genotype | Number of offspring | Expected Mendelian ratio | Actual ratio |
|----------|---------------------|--------------------------|--------------|
| +/+      | 370                 | 1                        | 1            |
| +/-      | 735                 | 2                        | 1.98         |
| -/-      | 85                  | 1                        | 0.23         |

**Table S1** Long term breeding statistics from *Cftr* knockout mice. Number of CFTR homozygous knockout (-/-) offsprings born from heterozygous cross is lower than expected (expected ratio: actual ratio = 1: 0.23).
